# Supplementary material for: A successful DFT calculation of carbon-13 NMR chemical shifts and carbon–fluorine spin–spin coupling constants in (η6-fluoroarene)tricarbonylchromium complexes
Source: Royal Society of Chemistry journal article supplement (doi:10.1039/c4ra01249f), 2014-01-01
Supplement: c4ra01249f1.pdf [file c4ra01249f1.pdf]

# A successful DFT calculation of carbon-13 NMR chemical shifts and carbon-fluorine spin-spin coupling constants in ( $\eta^6$ -fluoroarene)tricarbonylchromium complexes

Adam Gryff-Keller<sup>1</sup> and Przemysław Szczeciński

Department of Chemistry, Warsaw University of Technology, Noakowskiego 3, 00-664 Warszawa, Poland

Optimized molecular geometries of the minimum energy conformers of the investigated arenetricarbonylchromium complexes.

( $\eta^6$ -Fluorobenzene)trikarbonylchromium (**4**)

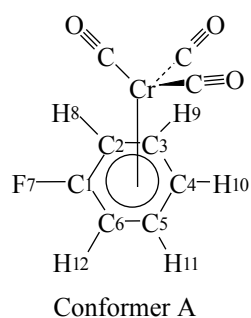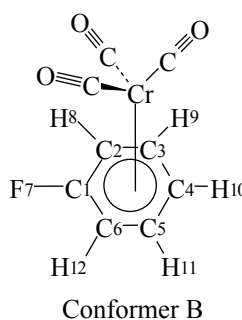

| No. | Atom | Conformer A |           |           | Conformer B |           |           |
|-----|------|-------------|-----------|-----------|-------------|-----------|-----------|
|     |      | x           | y         | z         | x           | y         | z         |
| 1   | C    | -1.879266   | 0.091554  | 0.000024  | -1.947437   | -0.254290 | 0.001566  |
| 2   | C    | -1.488877   | -0.442056 | 1.216994  | -1.568093   | 0.317069  | 1.222120  |
| 3   | C    | -0.654557   | -1.560171 | 1.201466  | -0.872256   | 1.544902  | 1.224146  |
| 4   | C    | -0.266183   | -2.147775 | 0.000337  | -0.515819   | 2.138630  | -0.002018 |
| 5   | C    | -0.654587   | -1.560506 | -1.200983 | -0.873922   | 1.542343  | -1.226374 |
| 6   | C    | -1.488857   | -0.442401 | -1.216824 | -1.569168   | 0.314155  | -1.220930 |
| 7   | F    | -2.631161   | 1.165653  | -0.000147 | -2.672305   | -1.387800 | 0.002999  |
| 8   | H    | -1.799809   | 0.033413  | 2.133018  | -1.826053   | -0.185054 | 2.144367  |
| 9   | H    | -0.297396   | -1.965123 | 2.136089  | -0.577282   | 1.996522  | 2.159945  |
| 10  | H    | 0.393648    | -3.000001 | 0.000450  | 0.059985    | 3.054009  | -0.003288 |
| 11  | H    | -0.297429   | -1.965725 | -2.135493 | -0.580450   | 1.992291  | -2.163468 |
| 12  | H    | -1.799760   | 0.032835  | -2.132979 | -1.829219   | -0.190101 | -2.141413 |
| 13  | Cr   | 0.274003    | -0.041046 | 0.000027  | 0.300450    | 0.049348  | -0.000361 |
| 14  | C    | 0.233208    | 1.803835  | -0.001183 | 0.863989    | -1.158252 | 1.300443  |
| 15  | O    | 0.174093    | 2.930118  | -0.001943 | 1.191179    | -1.899425 | 2.117188  |
| 16  | C    | 1.578331    | -0.011000 | 1.298948  | 2.001369    | 0.812333  | -0.002240 |
| 17  | O    | 2.359465    | -0.023143 | 2.114661  | 3.036982    | 1.312751  | -0.002295 |
| 18  | C    | 1.579168    | -0.012788 | -1.298075 | 0.861561    | -1.161540 | -1.299115 |
| 19  | O    | 2.360798    | -0.026140 | -2.113297 | 1.185791    | -1.905065 | -2.114902 |

<sup>1</sup> E-mail: [agryff@ch.pw.edu.pl](mailto:agryff@ch.pw.edu.pl)

( $\eta^6$ -1-Fluoro-3-dimethylaminobenzene)tricarbonylchromium (**5**)

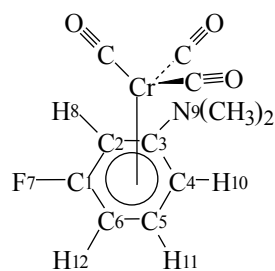

| No. | Atom | x         | y         | z         |
|-----|------|-----------|-----------|-----------|
| 1   | C    | -0.697154 | 1.834676  | -0.336841 |
| 2   | C    | 0.567194  | 1.535694  | 0.144602  |
| 3   | C    | 1.368000  | 0.608552  | -0.545571 |
| 4   | C    | 0.800035  | -0.055039 | -1.647515 |
| 5   | C    | -0.486100 | 0.257550  | -2.079936 |
| 6   | C    | -1.250041 | 1.237949  | -1.453088 |
| 7   | F    | -1.402032 | 2.727076  | 0.318394  |
| 8   | H    | 0.900675  | 2.033635  | 1.037950  |
| 9   | N    | 2.619971  | 0.324798  | -0.121210 |
| 10  | H    | 1.344103  | -0.834642 | -2.150056 |
| 11  | H    | -0.900689 | -0.283550 | -2.916699 |
| 12  | H    | -2.248792 | 1.491419  | -1.767945 |
| 13  | C    | 3.019925  | 0.776189  | 1.175613  |
| 14  | C    | 3.269598  | -0.838720 | -0.639991 |
| 15  | H    | 4.052215  | 0.487008  | 1.343793  |
| 16  | H    | 2.408245  | 0.345859  | 1.974881  |
| 17  | H    | 2.972608  | 1.861880  | 1.241273  |
| 18  | H    | 4.267219  | -0.899474 | -0.217295 |
| 19  | H    | 3.378613  | -0.774151 | -1.721215 |
| 20  | H    | 2.734628  | -1.760839 | -0.391911 |
| 21  | Cr   | -0.642025 | -0.291167 | -0.015813 |
| 22  | C    | -1.850360 | -0.003563 | 1.338184  |
| 23  | O    | -2.596329 | 0.197390  | 2.162683  |
| 24  | C    | -1.635152 | -1.726206 | -0.575210 |
| 25  | O    | -2.247346 | -2.600276 | -0.951607 |
| 26  | C    | 0.374051  | -1.363710 | 1.061945  |
| 27  | O    | 1.080959  | -1.981694 | 1.698487  |

( $\eta^6$ -1-Fluoro-4-dimetyloaminobenzene)tricarbonylchromium (**6**)

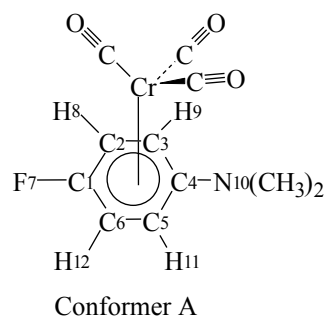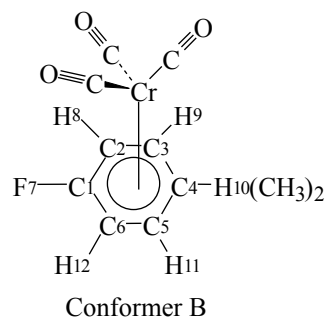

| No. | Atom | Conformer A |           |           | Conformer B |           |           |
|-----|------|-------------|-----------|-----------|-------------|-----------|-----------|
|     |      | x           | y         | z         | x           | y         | z         |
| 1   | C    | -1.391358   | -1.687583 | 0.000156  | -1.356236   | -1.727979 | -0.000379 |
| 2   | C    | -0.747961   | -1.497104 | 1.206906  | -0.713795   | -1.479005 | 1.195679  |
| 3   | C    | 0.593128    | -1.108394 | 1.193036  | 0.624613    | -1.083372 | 1.203227  |
| 4   | C    | 1.320973    | -0.990303 | -0.000129 | 1.335934    | -0.937154 | -0.000178 |
| 5   | C    | 0.592671    | -1.108233 | -1.193378 | 0.624630    | -1.082788 | -1.203678 |
| 6   | C    | -0.748106   | -1.496989 | -1.206957 | -0.713781   | -1.478430 | -1.196331 |
| 7   | F    | -2.661030   | -2.017402 | 0.000104  | -2.602303   | -2.147143 | -0.000481 |
| 8   | H    | -1.293439   | -1.611635 | 2.129502  | -1.259681   | -1.594602 | 2.119808  |
| 9   | H    | 1.073100    | -0.909605 | 2.136131  | 1.100545    | -0.886180 | 2.147035  |
| 10  | N    | 2.656945    | -0.693835 | -0.000195 | 2.643154    | -0.583412 | 0.000001  |
| 11  | H    | 1.072346    | -0.909191 | -2.136561 | 1.100547    | -0.885076 | -2.147378 |
| 12  | H    | -1.293876   | -1.611241 | -2.129418 | -1.259666   | -1.593590 | -2.120514 |
| 13  | C    | 3.190300    | -0.135928 | 1.202867  | 3.226848    | -0.122467 | 1.220812  |
| 14  | C    | 3.191026    | -0.137287 | -1.203607 | 3.227246    | 0.122093  | -1.220478 |
| 15  | H    | 4.247581    | 0.063598  | 1.058629  | 4.277363    | 0.088147  | 1.048312  |
| 16  | H    | 2.692415    | 0.801170  | 1.483433  | 2.751456    | 0.790038  | 1.595051  |
| 17  | H    | 3.107062    | -0.836967 | 2.030601  | 3.172865    | -0.889129 | 1.992054  |
| 18  | H    | 4.248476    | 0.061295  | -1.059264 | 4.277868    | 0.087801  | -1.047737 |
| 19  | H    | 2.694252    | 0.800080  | -1.485067 | 2.752426    | 0.790895  | -1.594278 |
| 20  | H    | 3.107381    | -0.838924 | -2.030777 | 3.172939    | -0.888294 | -1.992143 |
| 21  | Cr   | -0.515061   | 0.303111  | -0.000094 | -0.561839   | 0.306228  | 0.000061  |
| 22  | C    | -2.253149   | 0.911875  | -0.008034 | -1.583746   | 1.125025  | 1.281543  |
| 23  | O    | -3.328050   | 1.255532  | -0.012864 | -2.218099   | 1.602802  | 2.087385  |
| 24  | C    | -0.092779   | 1.521565  | 1.300277  | 0.627377    | 1.696347  | 0.000109  |
| 25  | O    | 0.192176    | 2.239743  | 2.128713  | 1.439312    | 2.487917  | -0.000029 |
| 26  | C    | -0.080297   | 1.526158  | -1.291729 | -1.583900   | 1.125583  | -1.280912 |
| 27  | O    | 0.212142    | 2.247669  | -2.114722 | -2.218090   | 1.603869  | -2.086584 |
